# Supplementary material for: Controlled evaporative self-assembly of hierarchically structured bottlebrush block copolymer with nanochannels
Source: Royal Society of Chemistry journal article supplement (doi:10.1039/c1jm10978b), 2011-01-01
Supplement: c1jm10978b.pdf [file c1jm10978b.pdf]

## Supporting Information

# Controlled Evaporative Self-Assembly of Hierarchically Structured Bottlebrush Block Copolymer with Nanochannels

Wei Han,<sup>a,b</sup> Myunghwan Byun,<sup>a</sup> Lei Zhao,<sup>a,b</sup> Javid Rzayev,<sup>c</sup> and Zhiqun Lin<sup>\*,a,b</sup>

- a. Department of Materials Science and Engineering, Iowa State University, Ames, Iowa 50011
- b. School of Materials Science and Engineering, Georgia Institute of Technology, Atlanta, GA 30332
- c. Department of Chemistry, University at Buffalo, The State University of New York, Buffalo, New York 14260

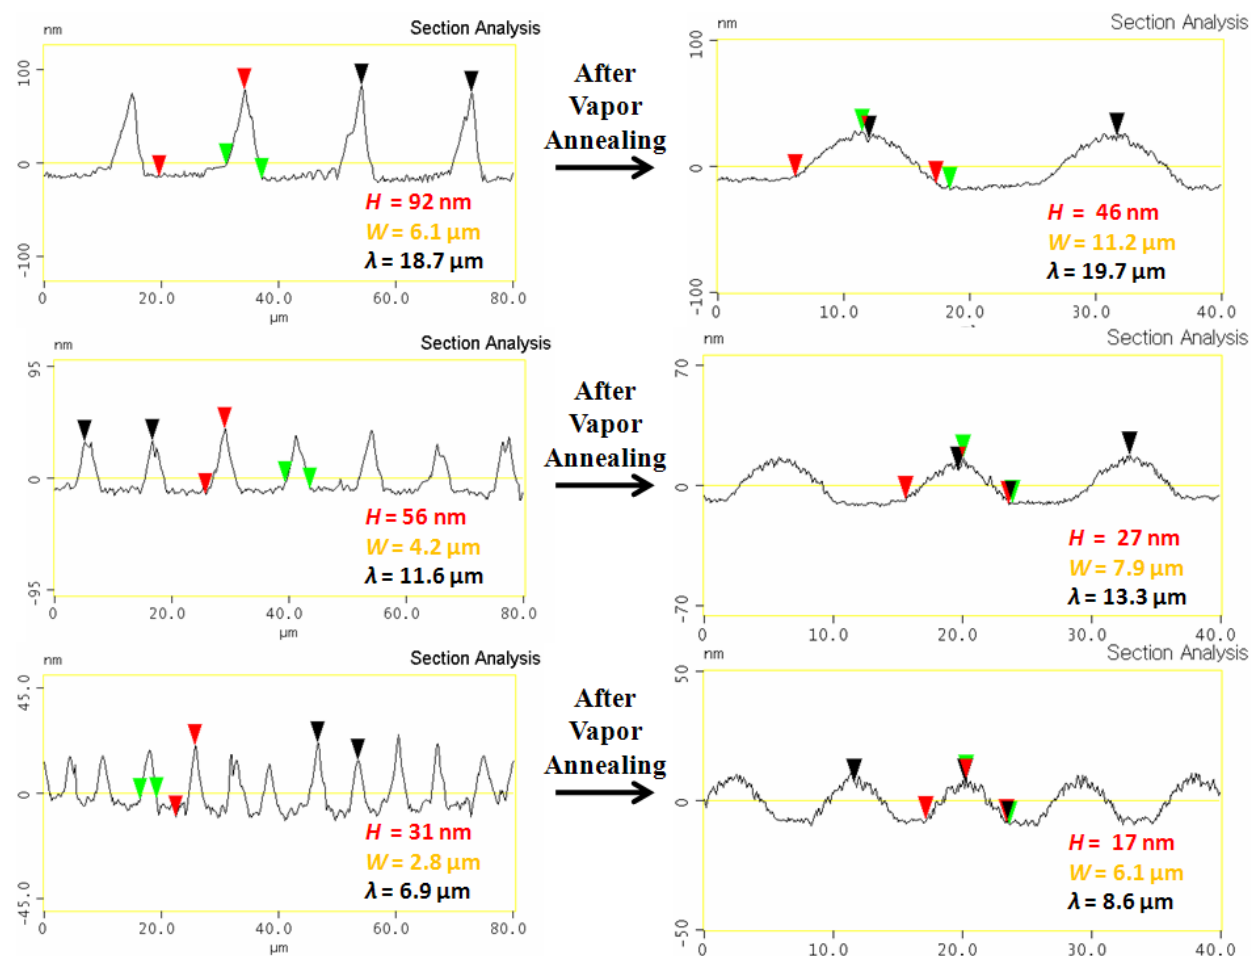

**Figure S1.** The cross-sectional view of AFM images shows the morphological evolution of the stripe height,  $H$ , stripe width,  $W$ , and the spacing between adjacent stripes,  $\lambda$  of PS-PLA stripes before and after the chloroform vapor annealing. The first, second, and third rows correspond to stripes taken in the outermost region, intermediate region, and innermost region, respectively.

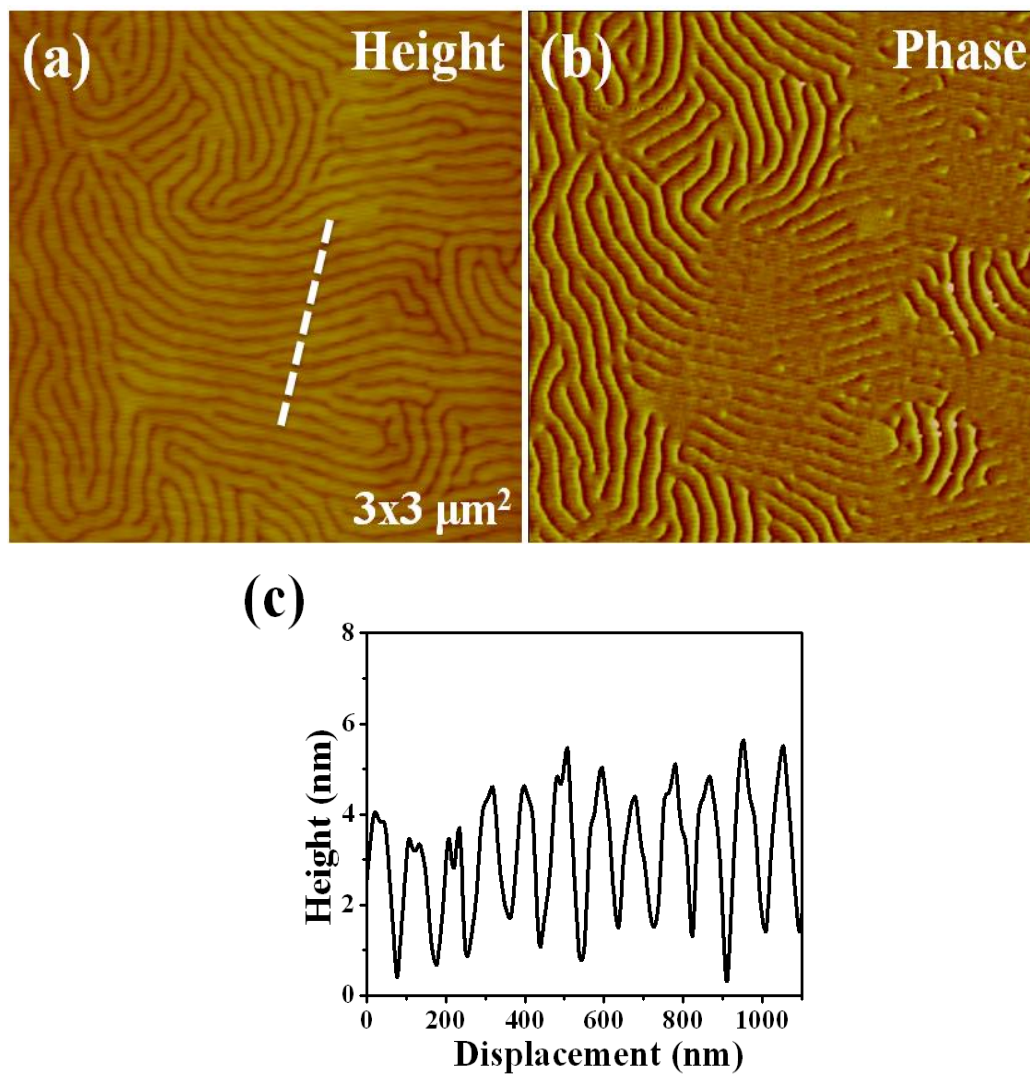

**Figure S2.** (a) AFM height and (b) phase images of lamellar morphology of PS-PLA within a stripe after the vapor annealing. (c) The cross-section analysis of the surface PS-PLA, corresponding to the white line labeled in (a). The average domain spacing,  $L_0 = 105 \pm 5$  nm, measured from the cross-section analysis in (c). Image size =  $3\mu\text{m} \times 3\mu\text{m}$ . Z range of the height image = 60nm.

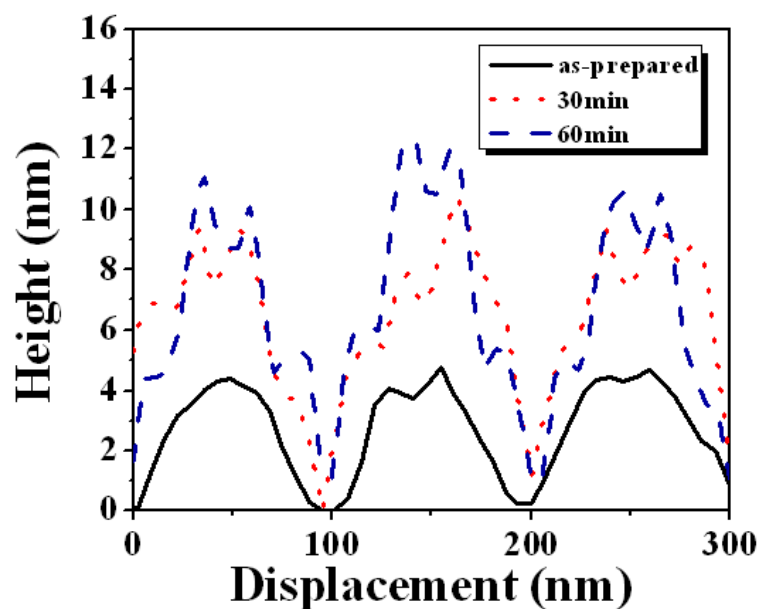

**Figure S3.** The height profiles for the AFM images shown in Figure 5, corresponding to different degradation times (i.e., as-prepared, 30min and 60min). The nanochannel depth increased with increased degradation time, which is indicative of the successful removal of PLA arms.
